# Supplementary material
Source: PubMed Central journal article supplement (PMC7093871)
Supplement: mmc1.pdf [file mmc1.pdf]

MSQSYHYIYSFXGLLSLWILCTSSSTNKCTVRXEVADCSHLKLTQIPDDLXNITVNLNTHNQLRRLPPA  
10 20 30 40 50 60 70

ABB76310.pro MSQSVPHYISSLWGLLSLWMLCTSSGKCTVRQEVADCSHLKLTQIPDDLPTNITVNLNTHNQIKRLPPA 70  
XP\_005630024. MSQSLLYHYISFLGLLPFWILCTSSSTNKCVVRHEVADCSHLKLTQVDDL PANITVNLNTHNQLRRLPPA 70  
NP\_942086.1.p MKGRSSYL IYSFGGLLSLWLVVSSSTNQCTVRYNVADCSHLKLTTHIPDDLPSNITVNLNTHNQLRGLPPA 70

NFTRYSQLTXLDGGFNISISKLEPELCQXLPPLKVLNLQHNELSQLSDQTFVFCXNLTELHLSMSNSIXKIQ  
80 90 100 110 120 130 140

ABB76310.pro NFTRYSQLTVLDGGFNTISKLEPELCQSLPQSLKVLNLQHNELSQLSDKTFVFCMNLTELHLSMSNSIQKIQ 140  
XP\_005630024. NFTRYSQLTILDGGFNISISKLEPELCQKLPLEILNLQHNELSHLSQDQTFVFCVNLTELHLSMSNSIKIQ 140  
NP\_942086.1.p NFTRYSQLALLDAGFNISISKLEPELCQILPPLKVLNLQHNELSQISDQTFVFCNLTELHLSMSNSIRKIK 140

NNPFKNQKNIKLDL SHNGLSSTKLGTLQLENLQELLSKNKIXALRXEELDFLGNSSLXKLELSSNPI  
150 160 170 180 190 200 210

ABB76310.pro NNPFKNQKNIKLDL SHNGLKSTKLGTLQQLQNLQELLSKNKIQALKSEELAF LGNSSLKLELSSNLI 210  
XP\_005630024. NNPFRLKNIKLDL SHNGLSSTKLGSLQLENLQELLSNNKINVL RREELDFLGNSSLKLELSSNPI 210  
NP\_942086.1.p SNPFKNQKSLIKLDL SHNGLSSTKLGTVQLENLQELLSAKNKIFALRNEELDFLGNSSLKLDLSSNPL 210

KEFSPGCFHAIGKLFGLXLNNAQLNPSLTEKLCLEL SNTSIQNL SLSNXQLXRTSNXTFLGLKHTNLTML  
220 230 240 250 260 270 280

ABB76310.pro KEFSPGCFHAIGQLFGLFLNNAQLGPSLTEKLCLEL SNTSIQNL SLSNSQLNRISNRTLLGLKHTNLTML 280  
XP\_005630024. KEFSPGCFHAIGKLFGLSLNNVQLNPSLTENL CLEL SNTSIQNL SLSNTQLHRTSNMTFLGLKHTNLTML 280  
NP\_942086.1.p KEFSPGCFHAIGKLFVLLNNAQLNLDL TEKLCWEL SNTSIQNL SLSANNQLLATSNTSFGSLKQTNLTSL 280

DLSHNNLNXIXNDSFVWLP HLKYLLEYNNIXHLXHSFYGLXNVRYLXLRKSFYKQSVSLASHPIXIDF  
290 300 310 320 330 340 350

ABB76310.pro DLSHNNLNMIDDSFVWLP HLKYL FLEYNNIVHLSNHSFYGLFNVRHLNLRKSFYKQSVSLTSLPKIDDF 350  
XP\_005630024. DLSHNNLNVIEENSFVWLP HLEYFLLEYNNIEHLFSHSFYGLFNVRHLNLRKSFYKQSVSLASHPRIDDF 350  
NP\_942086.1.p DLSYNSLRDVGNDAFSWLP HLKYL SLEYNNIQR LTPHSFRGLSNLRYLSLKRAFTKQSVSLASHPIXIDF 350

SFQWLKCLEYLNMEDNXIPGIKSNMFTGLIXLKYLSLSNSFTXLQTLTNETFXSLAHSPLLTNLTKNKI  
360 370 380 390 400 410 420

ABB76310.pro SFQWLRCLEYLNMEDNDIPSIKRNMTGLINLRYLSLSNSFTNLRTLKNETFSSLAHSPLLTNLTKNKI 420  
XP\_005630024. SFQWLKCLQYLNMEDNYFAGIKSNMFTGLIKLHLSLSNSFTSLQTLTNETFSLAQSPLITLNLTKNKI 420  
NP\_942086.1.p SFQWLKCLEHLNMDNTIPGIKSNMFTGLVSLKYLSLKTFTGLQTLTNETFVSLTHSPLLTNLTKNHI 420

SKIESGAFSWLGLXVLDLGLNEIGQELTGQEWRLGLENIFEIYLSYNKYQLTSSXSFALVPSLQRLMLRR  
430 440 450 460 470 480 490

ABB76310.pro SKIESDAFSLWGLSLEVLDIGINEIGQELTGQEWRLGLENIFEIYLSYNKYQLTSSXSFALVPSLQRLMLRR 490  
XP\_005630024. SKIESGAFSWLGHQLVLDLGLNEIGQELTGQEWRLGLENIFEIYLSYNKYQLTSSXSFALVPSLQRLMLRR 490  
NP\_942086.1.p SKIASGTFSWLGLRILDGLNEIGQELTGQEWRLGLENIFEIYLSYNKYQLTSSXSFALVPSLQRLMLRR 490

VALKNVDISPSPFHPLXNLTILDLSNANNIANINEELLEGLKLEILDQHNHLARLWKHANPGGPVHFLK  
500 510 520 530 540 550 560

ABB76310.pro VALKNVDISPSPFHPLHDLTILDLSNANNIANINEEMLEGLKLEVLQHNHLARLWKQANPGGPVHFLK 560  
XP\_005630024. TALRNVDISPSPFHPLRNILDLNANNIANINDELLEGLKLEILDMQHNNHLARLWKHANPGGPVHFLK 560  
NP\_942086.1.p VALKSVDISPSPFRLYNTILDLSNANNIANINEDLLEGLLENLEILDFQHNNHLARLWKHANPGGPVHFLK 560

GLSHLHILNLESNGLDEIPXVFKNLFELKSNLGLNLLXLPXSFDDQVSLKSLNLQKNLITSVEKXV  
570 580 590 600 610 620 630

ABB76310.pro GLSHLHILNLESNGLDEIPEGVFKNLFQKSNLALNLLNVLQPSVDFDDQVSLKSLNLQKNLITSVEKXV 630  
XP\_005630024. GLSHLHILNLESNGFDEIPA EVFKGLSELKSIDLGLNLLNIFPSSLFNDQVSLKSLNLQKNLITSVEKXV 630  
NP\_942086.1.p GLSHLHILNLESNGLDEIPVFKNLFELKSNLGLNLLNLTLPXSFDDQVSLRSLNLQKNLITSVEKXV 630

FGPAFXNLSNLDMSFNPFDCCTCESIAWVFNWIXTHTHNISELSSHYL CNTPPQYHGFPVXLFDTS SCKDS  
640 650 660 670 680 690 700

ABB76310.pro FGPVFKNLSNLDMSFNPFDCCTCESIAWVFNWINKTRTNISELSSHYL CNTPPQYHGFSVRLFDTS SCKDS 700  
XP\_005630024. FGPAFRNLSNLDMSFNPFDCCTCESIAWVFNWIXTHTHNISELSSHYL CNTPPQYHGFPVMLFDISPCCKDS 700  
NP\_942086.1.p FGPAFHNLNLSNLDMSFNPFDCCTCESIAWVTLNQTHTNIPELSTHYLCNTPPQYHGLPVKLFDTSSCKDS 700

APFELLFIINTSXLLTFIFIVLLIHFEGWRISFYWNVSVHRILGFKEIDXQPEQFEYTAIYIHAHKDRDW  
710 720 730 740 750 760 770

ABB76310.pro APFELLFIINTSFLLLFIFIVLLIHFEGWRISFYWNVSVHRILGFKEIDGQPEQFEYTAIYIHAHKDRDW 770  
XP\_005630024. APFEIFFIINTSVLLTFIFIVLLIHFEGWRISFYWNVSVHRILGFKEIDKQPEQFEYAAIYIHAHKDRDW 770  
NP\_942086.1.p APFQLLFIINTSTLLTFILAVLLIHFEGWRISFYWNVSVHRILGFKEIDAQGEQFEYTAIYIHAQKDRDW 770

VWEHFSPMEEEXDSLKFCLEERDFEAGVLEGLAIVNSIKRSRKII FVITQHLLKDP LCKRFKVHVAVQQA  
780 790 800 810 820 830 840

ABB76310.pro VWEHFSSMEEEDPSIKFCLEERDFQAGVLEGLAIVNSIKRSRKII FVITQHLLKDP LCKRFKVHVAVQQA 840  
XP\_005630024. VWEHFSPMEEKDETLKFCLEERDFEAGVLEGLAIVNSIKRSRKII FVITQHLLKDP LCKRFKVHVAVQQA 840  
NP\_942086.1.p VWEHFSPMEEQDQSLKFCLEERDFEAGVLEGLAIVNSIKRSRKII FVITHHLLKDP LCKRFKVHVAVQQA 840

IEQNLDIIILIFLENIPDYKLNHALCLRRGMFKSHCILNWPVQKERINAFHHLQVALGSRNSXH  
850 860 870 880 890 900

ABB76310.pro IEQNLDIIILIFLENIPDYKLNHALCLRRGMFKSRCIFYPVHKERIEAFHHLQVALGSRNSLH 905  
XP\_005630024. IEQNLESIIILFLEIPDYKLNHALCLRRGMFKSHCILNWPVQKERVNFAFHHLQVALGSRNSIH 905  
NP\_942086.1.p IEQNLDIIILIFLQNPIDYKLNHALCLRRGMFKSHCILNWPVQKERINAFHHLQVALGSRNSAH 905
