# Supplementary material
Source: PubMed Central journal article supplement (PMC7093871)
Supplement: mmc2.pdf [file mmc2.pdf]

MRQTLPIYIFWVGLLPGFGLCASSTNKCTVSQEVADCSHLKLTQVPDDLPTNITVLNLTHNQLRRLPAAN  
10 20 30 40 50 60 70  
BAG55034.1.pr MRQTLPIYIFWVGLLPGFGLCASSTNKCTVSQEVADCSHLKLTQVPDDLPTNITVLNLTHNQLRRLPAAN 70  
BAG55033.1.pr MRQTLPIYIFWVGLLPGFGLCASSTNKCTVSQEVADCSHLKLTQVPDDLPTNITVLNLTHNQLRRLPAAN 70  
XP\_003899477. MRQTLPIYIFWVGLLPGFGLCASSTNKCTVSQEVADCSHLKLTQVPDDLPTNITVLNLTHNQLRRLPAAN 70  
JAB01765.1.pr MRQTLPIYIFWVGLLPGFGLCASSTNKCTVSQEVADCSHLKLTQVPDDLPTNITVLNLTHNQLRRLPAAN 70  
XP\_003933874. MRQTLPIYIFWVGLLPGFGLCASSTNKCTVSQEVADCSHLKLTQVPDDLPTNITVLNLTHNQLRRLPAAN 70

FTRYSQTLTLDVGFNSISKLEPELCQKLPMLKVLNLQHNELSQLSDKTFACFCTNLTELHLSMSISQIKKN  
80 90 100 110 120 130 140  
BAG55034.1.pr FTRYSQTLTLDVGFNSISKLEPELCQKLPMLKVLNLQHNELSQLSDKTFACFCTNLTELHLSMSISQIKKN 140  
BAG55033.1.pr FTRYSQTLTLDVGFNSISKLEPELCQKLPMLKVLNLQHNELSQLSDKTFACFCTNLTELHLSMSISQIKKN 140  
XP\_003899477. FTRYSQTLTLDVGFNSISKLEPELCQKLPMLKVLNLQHNELSQLSDKTFACFCTNLTELHLSMSISQIKKN 140  
JAB01765.1.pr FTRYSQTLTLDVGFNSISKLEPELCQKLPMLKVLNLQHNELSQLSDKTFACFCTNLTELHLSMSISQIKKN 140  
XP\_003933874. FTRYSQTLTLDVGFNSISKLEPELCQKLPMLKVLNLQHNELSQLSDKTFACFCTNLTELHLSMSISQIKKN 140

NPFVKQKNLITLDLSDHNGLSSTKLTGTQVQLENLQELLSNNKIQALKSEELDILANSSKLELSSNQIK  
150 160 170 180 190 200 210  
BAG55034.1.pr NPFVKQKNLITLDLSDHNGLSSTKLTGTQVQLENLQELLSNNKIQALKSEELDILANSSKLELSSNQIK 210  
BAG55033.1.pr NPFVKQKNLITLDLSDHNGLSSTKLTGTQVQLENLQELLSNNKIQALKSEELDILANSSKLELSSNQIK 210  
XP\_003899477. NPFVKQKNLITLDLSDHNGLSSTKLTGTQVQLENLQELLSNNKIQALKSEELDILANSSKLELSSNQIK 210  
JAB01765.1.pr NPFVKQKNLITLDLSDHNGLSSTKLTGTQVQLENLQELLSNNKIQALKSEELDILANSSKLELSSNQIK 210  
XP\_003933874. NPFVKQKNLITLDLSDHNGLSSTKLTGTQVQLENLQELLSNNKIQALKSEELDILANSSKLELSSNQIK 210

EFSPGCFHAIIGRLGLFLNNVQLGPSLTEKLCLELANTSVRNLSLNSQSLSTTSNTTFLGLKWTNLTMD  
220 230 240 250 260 270 280  
BAG55034.1.pr EFSPGCFHAIIGRLGLFLNNVQLGPSLTEKLCLELANTSVRNLSLNSQSLSTTSNTTFLGLKWTNLTMD 280  
BAG55033.1.pr EFSPGCFHAIIGRLGLFLNNVQLGPSLTEKLCLELANTSVRNLSLNSQSLSTTSNTTFLGLKWTNLTMD 280  
XP\_003899477. EFSPGCFHAIIGRLGLFLNNVQLGPSLTEKLCLELANTSVRNLSLNSQSLSTTSNTTFLGLKWTNLTMD 280  
JAB01765.1.pr EFSPGCFHAIIGRLGLFLNNVQLGPSLTEKLCLELANTSVRNLSLNSQSLSTTSNTTFLGLKWTNLTMD 280  
XP\_003933874. EFSPGCFHAIIGRLGLFLNNVQLGPSLTEKLCLELANTSVRNLSLNSQSLSTTSNTTFLGLKWTNLTMD 280

LSHNNLVIGNDSFVWLPHLEYFFLEYNNIQHLLSHSLHGLFNVRYLNLKRSFTKQISLASLPKIDDFS  
290 300 310 320 330 340 350  
BAG55034.1.pr LSHNNLVIGNDSFVWLPHLEYFFLEYNNIQHLLSHSLHGLFNVRYLNLKRSFTKQISLASLPKIDDFS 350  
BAG55033.1.pr LSHNNLVIGNDSFVWLPHLEYFFLEYNNIQHLLSHSLHGLFNVRYLNLKRSFTKQISLASLPKIDDFS 350  
XP\_003899477. LSHNNLVIGNDSFVWLPHLEYFFLEYNNIQHLLSHSLHGLFNVRYLNLKRSFTKQISLASLPKIDDFS 350  
JAB01765.1.pr LSHNNLVIGNDSFVWLPHLEYFFLEYNNIQHLLSHSLHGLFNVRYLNLKRSFTKQISLASLPKIDDFS 350  
XP\_003933874. LSHNNLVIGNDSFVWLPHLEYFFLEYNNIQHLLSHSLHGLFNVRYLNLKRSFTKQISLASLPKIDDFS 350

FQWLTCLLEHLMEDNDISGKSNMFTGLINLKYLSLNSFSLQTLTNETFVSLAHSPLHLNLTKNKIS  
360 370 380 390 400 410 420  
BAG55034.1.pr FQWLTCLLEHLMEDNDISGKSNMFTGLINLKYLSLNSFSLQTLTNETFVSLAHSPLHLNLTKNKIS 420  
BAG55033.1.pr FQWLTCLLEHLMEDNDISGKSNMFTGLINLKYLSLNSFSLQTLTNETFVSLAHSPLHLNLTKNKIS 420  
XP\_003899477. FQWLTCLLEHLMEDNDISGKSNMFTGLINLKYLSLNSFSLQTLTNETFVSLAHSPLHLNLTKNKIS 420  
JAB01765.1.pr FQWLTCLLEHLMEDNDISGKSNMFTGLINLKYLSLNSFSLQTLTNETFVSLAHSPLHLNLTKNKIS 420  
XP\_003933874. FQWLTCLLEHLMEDNDISGKSNMFTGLINLKYLSLNSFSLQTLTNETFVSLAHSPLHLNLTKNKIS 420

KIESGAFSWLGHLEVLDLGLNEIGQELTGQEWGLENIFEIYLSYNYKQLTKNSFALVRSQRLMLRRV  
430 440 450 460 470 480 490  
BAG55034.1.pr KIESGAFSWLGHLEVLDLGLNEIGQELTGQEWGLENIFEIYLSYNYKQLTKNSFALVRSQRLMLRRV 490  
BAG55033.1.pr KIESGAFSWLGHLEVLDLGLNEIGQELTGQEWGLENIFEIYLSYNYKQLTKNSFALVRSQRLMLRRV 490  
XP\_003899477. KIESGAFSWLGHLEVLDLGLNEIGQELTGQEWGLENIFEIYLSYNYKQLTKNSFALVRSQRLMLRRV 490  
JAB01765.1.pr KIESGAFSWLGHLEVLDLGLNEIGQELTGQEWGLENIFEIYLSYNYKQLTKNSFALVRSQRLMLRRV 490  
XP\_003933874. KIESGAFSWLGHLEVLDLGLNEIGQELTGQEWGLENIFEIYLSYNYKQLTKNSFALVRSQRLMLRRV 490

ALKNVDCSPSPFPQPLGNLTLDLSDNANNIANDDMLEGLEKLEILDQHNNLARLWKHANPGGPVYFLKG  
500 510 520 530 540 550 560  
BAG55034.1.pr ALKNVDCSPSPFPQPLGNLTLDLSDNANNIANDDMLEGLEKLEILDQHNNLARLWKHANPGGPVYFLKG 560  
BAG55033.1.pr ALKNVDCSPSPFPQPLGNLTLDLSDNANNIANDDMLEGLEKLEILDQHNNLARLWKHANPGGPVYFLKG 560  
XP\_003899477. ALKNVDCSPSPFPQPLGNLTLDLSDNANNIANDDMLEGLEKLEILDQHNNLARLWKHANPGGPVYFLKG 560  
JAB01765.1.pr ALKNVDCSPSPFPQPLGNLTLDLSDNANNIANDDMLEGLEKLEILDQHNNLARLWKHANPGGPVYFLKG 560  
XP\_003933874. ALKNVDCSPSPFPQPLGNLTLDLSDNANNIANDDMLEGLEKLEILDQHNNLARLWKHANPGGPVYFLKG 560

LSHLHILNLESNGFDEIPVEVFKDSELKIIDLGLNNTLPASVFDNQVLSKSLNLQKNLITSVEKKVF  
570 580 590 600 610 620 630  
BAG55034.1.pr LSHLHILNLESNGFDEIPVEVFKDSELKIIDLGLNNTLPASVFDNQVLSKSLNLQKNLITSVEKKVF 630  
BAG55033.1.pr LSHLHILNLESNGFDEIPVEVFKDSELKIIDLGLNNTLPASVFDNQVLSKSLNLQKNLITSVEKKVF 630  
XP\_003899477. LSHLHILNLESNGFDEIPVEVFKDSELKIIDLGLNNTLPASVFDNQVLSKSLNLQKNLITSVEKKVF 630  
JAB01765.1.pr LSHLHILNLESNGFDEIPVEVFKDSELKIIDLGLNNTLPASVFDNQVLSKSLNLQKNLITSVEKKVF 630  
XP\_003933874. LSHLHILNLESNGFDEIPVEVFKDSELKIIDLGLNNTLPASVFDNQVLSKSLNLQKNLITSVEKKVF 630

GPAFRNLSNLMRFPDCTCESIAWVFNWINKTHANIPELSSHYLNTPPHYHGFVRLFDTSCKDASA  
640 650 660 670 680 690 700  
BAG55034.1.pr GPAFRNLSNLMRFPDCTCESIAWVFNWINKTHANIPELSSHYLNTPPHYHGFVRLFDTSCKDASA 700  
BAG55033.1.pr GPAFRNLSNLMRFPDCTCESIAWVFNWINKTHANIPELSSHYLNTPPHYHGFVRLFDTSCKDASA 700  
XP\_003899477. GPAFRNLSNLMRFPDCTCESIAWVFNWINKTHANIPELSSHYLNTPPHYHGFVRLFDTSCKDASA 700  
JAB01765.1.pr GPAFRNLSNLMRFPDCTCESIAWVFNWINKTHANIPELSSHYLNTPPHYHGFVRLFDTSCKDASA 700  
XP\_003933874. GPAFRNLSNLMRFPDCTCESIAWVFNWINKTHANIPELSSHYLNTPPHYHGFVRLFDTSCKDASA 700

PFELFFIINTSILLIFIVVLLIHFEGRWISFYVNVSVHRVLFGEIDRQTEQFEYAAIYIHAHKDKDWV  
710 720 730 740 750 760 770  
BAG55034.1.pr PFELFFIINTSILLIFIVVLLIHFEGRWISFYVNVSVHRVLFGEIDRQTEQFEYAAIYIHAHKDKDWV 770  
BAG55033.1.pr PFELFFIINTSILLIFIVVLLIHFEGRWISFYVNVSVHRVLFGEIDRQTEQFEYAAIYIHAHKDKDWV 770  
XP\_003899477. PFELFFIINTSILLIFIVVLLIHFEGRWISFYVNVSVHRVLFGEIDRQTEQFEYAAIYIHAHKDKDWV 770  
JAB01765.1.pr PFELFFIINTSILLIFIVVLLIHFEGRWISFYVNVSVHRVLFGEIDRQTEQFEYAAIYIHAHKDKDWV 770  
XP\_003933874. PFELFFIINTSILLIFIVVLLIHFEGRWISFYVNVSVHRVLFGEIDRQTEQFEYAAIYIHAHKDKDWV 770

WEHFSSMEKEDQSKLFCLEERDFEAGVFLEAIVNSIKRSRKIIIFITHHLLKDPLCKRFKVHHAQQAI  
780 790 800 810 820 830 840  
BAG55034.1.pr WEHFSSMEKEDQSKLFCLEERDFEAGVFLEAIVNSIKRSRKIIIFITHHLLKDPLCKRFKVHHAQQAI 840  
BAG55033.1.pr WEHFSSMEKEDQSKLFCLEERDFEAGVFLEAIVNSIKRSRKIIIFITHHLLKDPLCKRFKVHHAQQAI 840  
XP\_003899477. WEHFSSMEKEDQSKLFCLEERDFEAGVFLEAIVNSIKRSRKIIIFITHHLLKDPLCKRFKVHHAQQAI 840  
JAB01765.1.pr WEHFSSMEKEDQSKLFCLEERDFEAGVFLEAIVNSIKRSRKIIIFITHHLLKDPLCKRFKVHHAQQAI 840  
XP\_003933874. WEHFSSMEKEDQSKLFCLEERDFEAGVFLEAIVNSIKRSRKIIIFITHHLLKDPLCKRFKVHHAQQAI 840

EQNLDSIILFLEEIPDYKLNHALCLRRGMFKSHCILNWPVQKERIGAFHHKLQVALGSKNSVH  
850 860 870 880 890 900  
BAG55034.1.pr EQNLDSIILFLEEIPDYKLNHALCLRRGMFKSHCILNWPVQKERIGAFHHKLQVALGSKNSVH 904  
BAG55033.1.pr EQNLDSIILFLEEIPDYKLNHALCLRRGMFKSHCILNWPVQKERIGAFHHKLQVALGSKNSVH 904  
XP\_003899477. EQNLDSIILFLEEIPDYKLNHALCLRRGMFKSHCILNWPVQKERIGAFHHKLQVALGSKNSVH 904  
JAB01765.1.pr EQNLDSIILFLEEIPDYKLNHALCLRRGMFKSHCILNWPVQKERIGAFHHKLQVALGSKNSVH 904  
XP\_003933874. EQNLDSIILFLEEIPDYKLNHALCLRRGMFKSHCILNWPVQKERIGAFHHKLQVALGSKNSVH 904
